# Supplementary material
Source: PubMed Central journal article supplement (PMC7367727)
Supplement: NIHMS1580719-supplement-1.pdf [file NIHMS1580719-supplement-1.pdf]

# Supplementary Figure S1

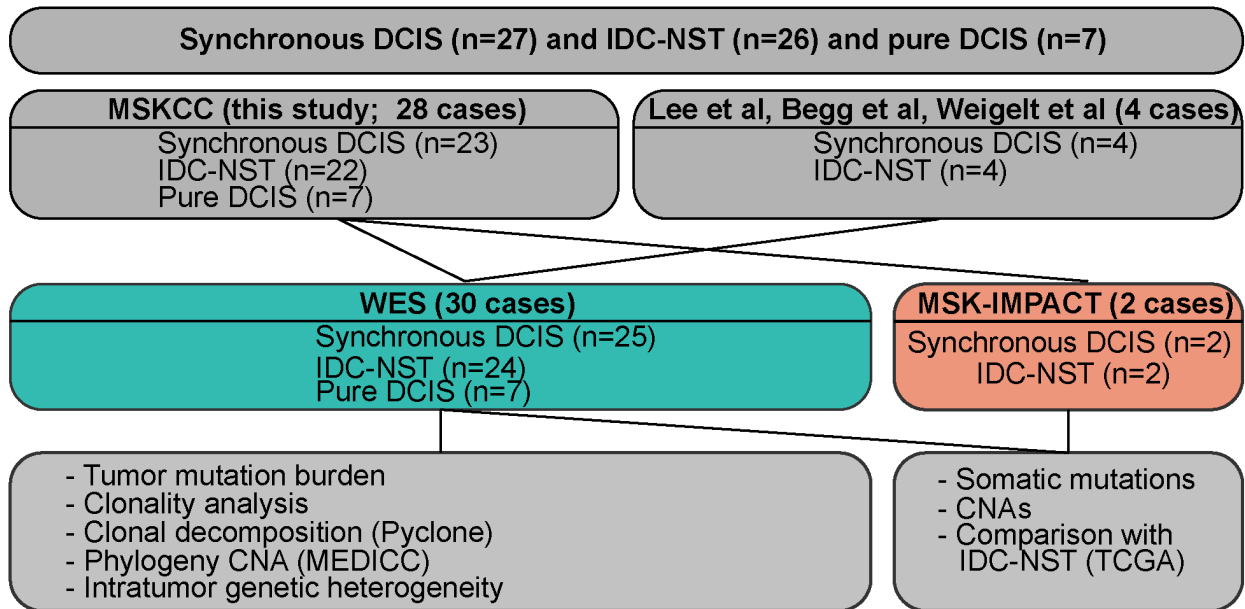

**Supplementary Figure S1.** Schematic representation of the samples, sequencing methods and analyses employed in this study.
