# Supplementary material
Source: PubMed Central journal article supplement (PMC7367727)
Supplement: NIHMS1580719-supplement-5.pdf [file NIHMS1580719-supplement-5.pdf]

# Supplementary Figure S4

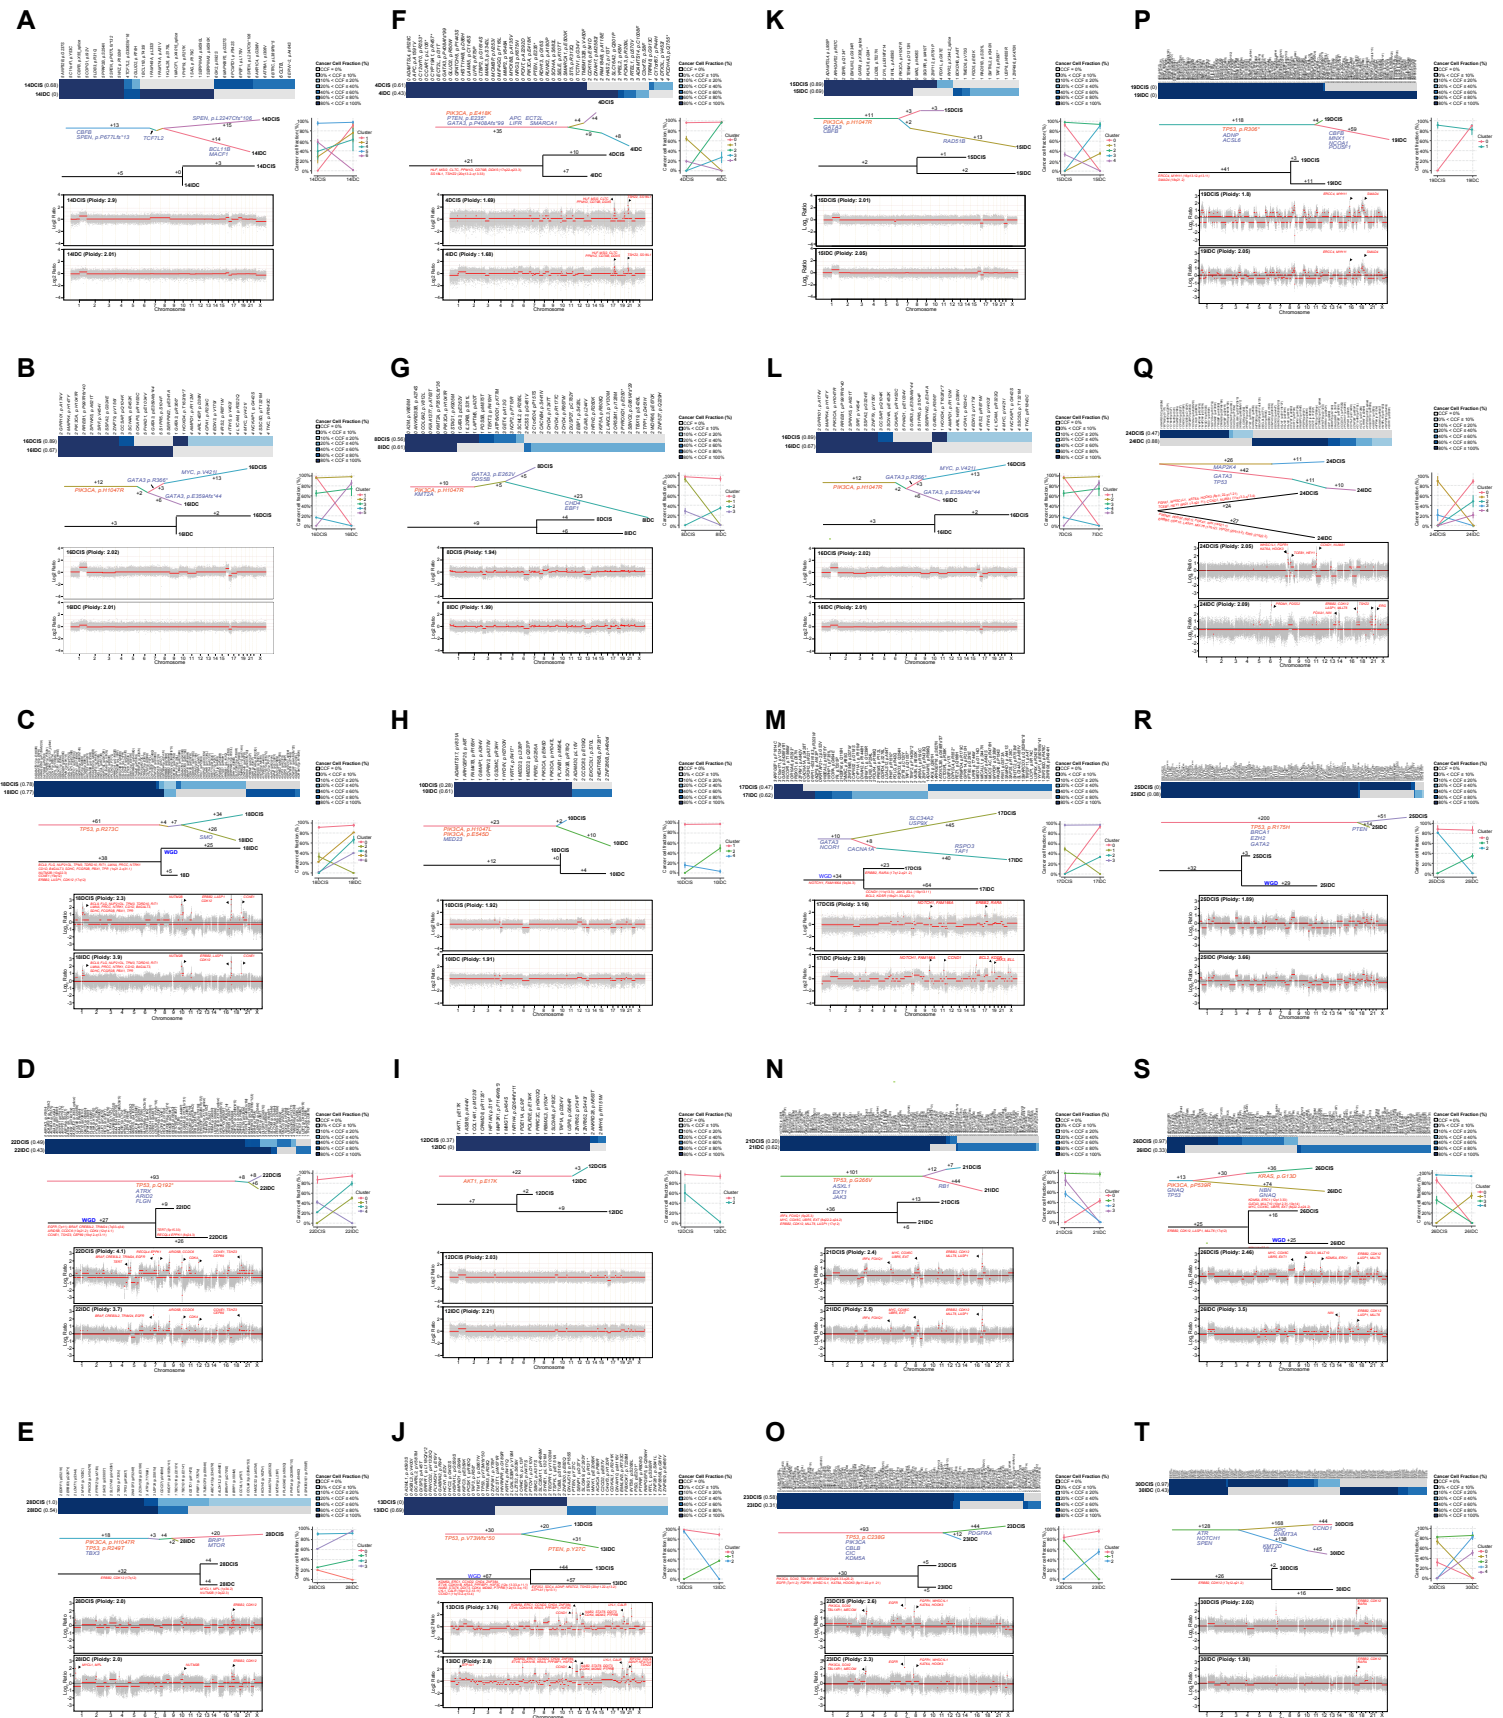

**Supplementary Figure S4. Clonal relatedness, clonal decomposition and phylogenetic analysis of synchronously diagnosed ductal carcinoma *in situ* and invasive breast cancers**

(A-T) Clonal decomposition and phylogenetic analysis of (A) Case 14, (B) Case 16, (C) Case 18, (D) Case 22, (E) Case 28, (F) Case 4, (G) Case 8, (H) Case 10, (I) Case 12, (J) Case 13, (K) Case 15, (L) Case 16, (M) Case 17, (N) Case 21, (O) Case 23, (P) Case 19, (Q) Case 24, (R) Case 25, (S) Case 26 and (T) Case 30. Clonal frequency heatmaps of mutations in the DCIS and synchronous IDC-NST of a given case are shown (**top**), grouped by their clonal/subclonal structure (clusters) as inferred by PyClone. Cancer cell fractions are color-coded according to the legend. Shannon index of intratumor heterogeneity is shown in parentheses to the left. PyClone parallel coordinates plots are shown (**middle right**). Copy number plots depicting segmented Log<sub>2</sub> ratios (*y*-axis) according to genomic position (*x*-axis) of DCIS and IDC-NSTs are depicted (**bottom**). Genes included in amplifications are shown in red. PyClone-derived phylogenetic trees of synchronous DCIS and IDC-NST (**middle center**) are shown. Trunk and branches are colored according to clusters as per PyClone, and the number of somatic mutations that result in the divergence of a clone/subclone from its ancestor are shown. Cancer genes (**blue**) and hotspot mutations (**orange**) that define a given clone are depicted. Phylogenetic trees based on copy number alterations is shown (**middle center**). The numbers alongside the branches represent the total number of copy number alterations. Genes included in amplifications are shown in red.
