# Supplementary material
Source: PubMed Central journal article supplement (PMC7367727)
Supplement: NIHMS1580719-supplement-8.pdf [file NIHMS1580719-supplement-8.pdf]

**Supplementary Table S1. Sequencing statistics of tumor and matched normal samples of the DCIS and IDC-NSTs subjected to whole-exome or targeted capture massively parallel sequencing.**

| Case ID | Tissue type (Sample ID) | Sequencing type        | Total reads | Mean target coverage (x) | % Target bases 2x | % Target bases 50x | % Target bases 100x |
|---------|-------------------------|------------------------|-------------|--------------------------|-------------------|--------------------|---------------------|
| Case 2  | DCIS (2DCISA)           | Whole exome sequencing | 207,743,539 | 246.17                   | 99.7%             | 96.7%              | 88.8%               |
|         | DCIS (2DCISB)           | Whole exome sequencing | 316,094,599 | 246.05                   | 99.6%             | 95.9%              | 87.4%               |
|         | IDC-NST (2IDCA)         | Whole exome sequencing | 252,341,816 | 257.51                   | 99.7%             | 93.4%              | 78.7%               |
|         | IDC-NST (2IDCB)         | Whole exome sequencing | 228,120,350 | 262.07                   | 99.7%             | 94.5%              | 80.8%               |
| Case 3  | Normal (2N)             | Whole exome sequencing | 114,784,419 | 141.77                   | 99.6%             | 91.2%              | 66.4%               |
|         | DCIS (3DCIS)            | MSK-IMPACT410          | 20,300,027  | 524.60                   | 99.4%             | 98.7%              | 97.2%               |
|         | IDC-NST (3IDC)          | MSK-IMPACT410          | 25,849,783  | 720.14                   | 99.4%             | 98.7%              | 97.8%               |
| Case 4  | Normal (3N)             | MSK-IMPACT410          | 21,718,155  | 697.41                   | 99.4%             | 98.8%              | 97.3%               |
|         | DCIS (4DCIS)            | Whole exome sequencing | 195,631,331 | 259.49                   | 99.8%             | 96.5%              | 87.2%               |
|         | IDC-NST (4IDC)          | Whole exome sequencing | 195,002,112 | 299.06                   | 99.8%             | 95.0%              | 82.9%               |
| Case 5  | Normal (4N)             | Whole exome sequencing | 187,450,027 | 214.61                   | 99.8%             | 87.2%              | 65.1%               |
|         | DCIS (5DCISA)           | Whole exome sequencing | 199,437,039 | 312.88                   | 99.8%             | 96.9%              | 88.7%               |
|         | DCIS (5DCISB)           | Whole exome sequencing | 179,488,648 | 245.05                   | 99.8%             | 94.6%              | 81.0%               |
|         | IDC-NST (5IDC)          | Whole exome sequencing | 165,478,058 | 270.06                   | 99.8%             | 96.2%              | 87.1%               |
| Case 6  | Normal (5N)             | Whole exome sequencing | 73,299,225  | 114.50                   | 99.8%             | 86.3%              | 52.7%               |
|         | DCIS (6DCIS)            | Whole exome sequencing | 179,234,825 | 276.25                   | 99.8%             | 94.9%              | 81.4%               |
|         | IDC-NST (6IDC)          | Whole exome sequencing | 170,329,624 | 249.68                   | 99.8%             | 94.1%              | 78.6%               |
| Case 7  | Normal (6N)             | Whole exome sequencing | 81,110,452  | 125.89                   | 99.8%             | 78.3%              | 49.1%               |
|         | DCIS (7DCIS)            | Whole exome sequencing | 172,380,913 | 244.59                   | 99.8%             | 96.7%              | 87.4%               |
|         | IDC-NST (7IDC)          | Whole exome sequencing | 172,569,537 | 246.69                   | 99.8%             | 95.9%              | 84.7%               |
| Case 8  | Normal (7N)             | Whole exome sequencing | 92,367,131  | 137.34                   | 99.8%             | 91.1%              | 65.5%               |
|         | DCIS (8DCIS)            | Whole exome sequencing | 186,273,001 | 252.06                   | 99.8%             | 97.1%              | 89.2%               |
|         | IDC-NST (8IDC)          | Whole exome sequencing | 237,850,268 | 321.01                   | 99.8%             | 97.6%              | 90.8%               |
| Case 9  | Normal (8N)             | Whole exome sequencing | 78,481,551  | 125.67                   | 99.7%             | 89.2%              | 60.4%               |
|         | DCIS (9DCIS)            | MSK-IMPACT468          | 19,004,756  | 643.96                   | 99.5%             | 98.9%              | 98.3%               |
|         | IDC-NST (9IDC)          | MSK-IMPACT468          | 17,773,892  | 548.15                   | 99.5%             | 98.9%              | 98.2%               |
| Case 10 | Normal (9N)             | MSK-IMPACT468          | 11,459,309  | 401.51                   | 99.4%             | 98.7%              | 97.5%               |
|         | DCIS (10DCIS)           | Whole exome sequencing | 216,198,702 | 235.62                   | 99.7%             | 96.4%              | 87.5%               |
|         | IDC-NST (10IDC)         | Whole exome sequencing | 304,125,431 | 212.23                   | 99.6%             | 95.4%              | 84.6%               |
| Case 12 | Normal (10N)            | Whole exome sequencing | 95,944,999  | 114.01                   | 99.7%             | 85.5%              | 51.4%               |
|         | DCIS (12DCIS)           | Whole exome sequencing | 200,781,290 | 237.08                   | 99.7%             | 96.3%              | 87.2%               |
|         | IDC-NST (12IDC)         | Whole exome sequencing | 241,755,460 | 317.28                   | 99.6%             | 97.0%              | 91.8%               |
| Case 13 | Normal (12N)            | Whole exome sequencing | 91,430,780  | 108.91                   | 99.6%             | 85.1%              | 51.0%               |
|         | DCIS (13DCIS)           | Whole exome sequencing | 322,309,642 | 264.38                   | 99.7%             | 96.9%              | 89.0%               |
|         | IDC-NST (13IDC)         | Whole exome sequencing | 200,598,095 | 300.23                   | 99.8%             | 96.8%              | 89.1%               |
| Case 14 | Normal (13N)            | Whole exome sequencing | 105,584,799 | 111.39                   | 99.6%             | 85.3%              | 51.2%               |
|         | DCIS (14DCIS)           | Whole exome sequencing | 133,143,299 | 159.85                   | 99.8%             | 94.8%              | 75.8%               |
|         | IDC-NST (14IDC)         | Whole exome sequencing | 118,090,698 | 143.46                   | 99.8%             | 93.6%              | 70.5%               |
| Case 15 | Normal (14N)            | Whole exome sequencing | 208,195,481 | 238.87                   | 99.8%             | 97.9%              | 90.1%               |
|         | DCIS (15DCIS)           | Whole exome sequencing | 204,388,482 | 247.44                   | 99.8%             | 97.9%              | 90.7%               |
|         | IDC-NST (15IDC)         | Whole exome sequencing | 150,916,271 | 175.10                   | 99.8%             | 95.7%              | 79.1%               |
| Case 16 | Normal (15N)            | Whole exome sequencing | 191,199,284 | 123.21                   | 99.8%             | 97.3%              | 87.6%               |
|         | DCIS (16DCIS)           | Whole exome sequencing | 184,813,810 | 217.49                   | 99.8%             | 97.4%              | 87.0%               |
|         | IDC-NST (16IDC)         | Whole exome sequencing | 229,943,512 | 257.14                   | 99.8%             | 98.3%              | 92.4%               |
| Case 17 | Normal (16N)            | Whole exome sequencing | 151,766,745 | 187.72                   | 99.8%             | 95.8%              | 81.5%               |
|         | DCIS (17DCIS)           | Whole exome sequencing | 177,358,563 | 171.16                   | 99.7%             | 93.3%              | 76.2%               |
|         | IDC-NST (17IDC)         | Whole exome sequencing | 112,201,249 | 149.14                   | 99.8%             | 88.5%              | 63.9%               |
| Case 18 | Normal (17N)            | Whole exome sequencing | 113,427,184 | 172.74                   | 99.8%             | 93.9%              | 76.4%               |
|         | DCIS (18DCIS)           | Whole exome sequencing | 226,914,782 | 173.83                   | 98.8%             | 96.9%              | 77.0%               |
|         | IDC-NST (18IDC)         | Whole exome sequencing | 207,460,217 | 154.43                   | 98.7%             | 92.9%              | 60.8%               |
| Case 19 | Normal (18N)            | Whole exome sequencing | 157,908,826 | 115.96                   | 98.8%             | 84.3%              | 46.6%               |
|         | DCIS (19DCIS)           | Whole exome sequencing | 269,398,612 | 160.07                   | 98.7%             | 94.7%              | 67.1%               |
|         | IDC-NST (19IDC)         | Whole exome sequencing | 246,728,033 | 182.36                   | 98.7%             | 96.9%              | 78.1%               |
| Case 21 | Normal (19N)            | Whole exome sequencing | 119,909,010 | 108.13                   | 98.7%             | 88.7%              | 44.5%               |
|         | DCIS (21DCIS)           | Whole exome sequencing | 216,338,549 | 185.23                   | 98.7%             | 96.3%              | 76.8%               |
|         | IDC-NST (21IDC)         | Whole exome sequencing | 231,729,987 | 180.14                   | 98.7%             | 95.3%              | 71.7%               |
| Case 22 | Normal (21N)            | Whole exome sequencing | 142,013,040 | 134.33                   | 98.7%             | 86.0%              | 56.6%               |
|         | DCIS (22DCIS)           | Whole exome sequencing | 212,988,648 | 172.28                   | 98.8%             | 97.2%              | 81.0%               |
|         | IDC-NST (22IDC)         | Whole exome sequencing | 220,014,188 | 182.76                   | 98.8%             | 96.6%              | 78.9%               |
| Case 23 | Normal (22N)            | Whole exome sequencing | 142,539,465 | 129.83                   | 98.9%             | 94.1%              | 63.5%               |
|         | DCIS (23DCIS)           | Whole exome sequencing | 207,545,037 | 130.09                   | 98.7%             | 95.4%              | 62.3%               |
|         | IDC-NST (23IDC)         | Whole exome sequencing | 208,447,898 | 148.78                   | 98.8%             | 96.7%              | 74.7%               |
| Case 24 | Normal (23N)            | Whole exome sequencing | 119,798,820 | 110.65                   | 98.7%             | 84.3%              | 45.9%               |
|         | DCIS (24DCIS)           | Whole exome sequencing | 237,021,316 | 149.75                   | 98.6%             | 91.3%              | 63.2%               |
|         | IDC-NST (24IDC)         | Whole exome sequencing | 231,720,110 | 141.13                   | 98.6%             | 94.3%              | 68.0%               |
| Case 25 | Normal (24N)            | Whole exome sequencing | 129,436,958 | 102.78                   | 98.8%             | 85.0%              | 41.3%               |
|         | DCIS (25DCIS)           | Whole exome sequencing | 198,806,351 | 170.04                   | 98.8%             | 92.4%              | 68.2%               |
|         | IDC-NST (25IDC)         | Whole exome sequencing | 267,131,787 | 197.60                   | 98.7%             | 95.1%              | 74.8%               |
| Case 26 | Normal (25N)            | Whole exome sequencing | 114,187,645 | 113.08                   | 98.7%             | 84.8%              | 45.8%               |
|         | DCIS (26DCIS)           | Whole exome sequencing | 251,958,064 | 190.80                   | 98.8%             | 97.7%              | 86.5%               |
|         | IDC-NST (26IDC)         | Whole exome sequencing | 214,337,938 | 165.49                   | 98.8%             | 96.7%              | 76.3%               |
| Case 28 | Normal (26N)            | Whole exome sequencing | 134,024,745 | 132.52                   | 98.8%             | 95.2%              | 63.1%               |
|         | DCIS (28DCIS)           | Whole exome sequencing | 248,418,058 | 198.53                   | 98.8%             | 95.0%              | 79.9%               |
|         | IDC-NST (28IDC)         | Whole exome sequencing | 267,854,846 | 135.50                   | 98.9%             | 96.3%              | 68.1%               |
| Case 30 | Normal (28N)            | Whole exome sequencing | 154,861,845 | 135.58                   | 98.9%             | 92.3%              | 60.8%               |
|         | DCIS (30DCIS)           | Whole exome sequencing | 232,467,506 | 182.28                   | 98.7%             | 93.2%              | 66.2%               |
|         | IDC-NST (30IDC)         | Whole exome sequencing | 265,310,671 | 186.93                   | 98.7%             | 95.6%              | 71.6%               |
| Case 31 | Normal (30N)            | Whole exome sequencing | 156,615,573 | 119.09                   | 98.7%             | 76.5%              | 49.2%               |
|         | DCIS (31DCIS)           | Whole exome sequencing | 348,353,376 | 144.42                   | 98.8%             | 94.4%              | 68.6%               |
|         | Normal (31N)            | Whole exome sequencing | 154,431,455 | 117.08                   | 98.7%             | 89.0%              | 53.3%               |
| Case 32 | DCIS (32DCIS)           | Whole exome sequencing | 298,975,973 | 161.04                   | 98.7%             | 95.6%              | 74.9%               |
|         | Normal (32N)            | Whole exome sequencing | 171,835,337 | 119.44                   | 98.6%             | 91.2%              | 54.4%               |
| Case 33 | DCIS (33DCIS)           | Whole exome sequencing | 278,589,079 | 149.43                   | 98.7%             | 94.9%              | 71.9%               |
|         | Normal (33N)            | Whole exome sequencing | 149,292,060 | 138.42                   | 98.7%             | 95.0%              | 69.3%               |
| Case 34 | DCIS (34DCIS)           | Whole exome sequencing | 361,939,268 | 144.29                   | 98.6%             | 95.0%              | 68.3%               |
|         | Normal (34N)            | Whole exome sequencing | 144,339,312 | 110.27                   | 98.6%             | 87.8%              | 47.7%               |
| Case 35 | DCIS (35DCIS)           | Whole exome sequencing | 414,677,110 | 163.66                   | 98.7%             | 92.9%              | 72.2%               |
|         | Normal (35N)            | Whole exome sequencing | 157,673,292 | 134.24                   | 98.7%             | 95.2%              | 66.3%               |
| Case 38 | DCIS (38DCIS)           | Whole exome sequencing | 300,595,924 | 174.75                   | 98.7%             | 96.9%              | 82.2%               |
|         | Normal (38N)            | Whole exome sequencing | 166,009,097 | 120.46                   | 98.8%             | 93.1%              | 56.9%               |
| Case 40 | DCIS (40DCIS)           | Whole exome sequencing | 296,512,648 | 170.48                   | 98.8%             | 97.0%              | 81.5%               |
|         | Normal (40N)            | Whole exome sequencing | 149,350,055 | 126.73                   | 98.7%             | 94.2%              | 63.0%               |

DCIS, ductal carcinoma in situ; IDC-NST, invasive ductal carcinoma of no special type
